# Supplementary material for: Next-generation sequencing-based clinical diagnosis of choroideremia and comprehensive mutational and clinical analyses
Source: Springer Nature journal article supplement (doi:10.1186/s12886-020-01478-x), 2020-06-01
Supplement: MOESM2 [file 18042088]

| <b>Gene</b> | <b>OMIM</b> | <b>Gene</b> | <b>OMIM</b> | <b>Gene</b> | <b>OMIM</b> | <b>Gene</b> | <b>OMIM</b> |
|-------------|-------------|-------------|-------------|-------------|-------------|-------------|-------------|
| GJA8        | 600897      | LYST        | 606897      | NDP         | 300658      | BCOR        | 300485      |
| CRYBA1      | 123610      | ERCC8       | 609412      | RP1L1       | 608581      | SOX2        | 184429      |
| PITX3       | 602669      | LONP1       | 605490      | CTNNA1      | 116805      | OTX2        | 600037      |
| BFSP2       | 603212      | PIGL        | 605947      | MT-TH       | 590040      | BMP4        | 112262      |
| GCNT2       | 600429      | CTDP1       | 604927      | TIMP3       | 188826      | HCCS        | 300056      |
| GJA3        | 121015      | FBN2        | 612570      | ABCC6       | 177850      | TTR         | 105210      |
| MIP         | 154050      | POMT1       | 607423      | RDH5        | 601617      | TCOF1       | 606847      |
| CRYAB       | 123590      | TMEM5       | 605862      | WDR19       | 608151      | TUBB3       | 602661      |
| CRYBB1      | 600929      | B3GALNT2    | 610194      | KCNV2       | 607604      | VHL         | 608537      |
| FYCO1       | 607182      | POMK        | 615247      | CACNA2D4    | 608171      | SMOC1       | 608488      |
| LIM2        | 154045      | GMPPB       | 615320      | CLCN7       | 602727      | TYR         | 606933      |
| CRYGC       | 123680      | POMT2       | 607439      | HFE         | 613609      | PAX3        | 606597      |
| CRYGS       | 123730      | POMGNT1     | 606822      | ASRGL1      | 609212      | MITF        | 156845      |
| MAF         | 177075      | FKTN        | 607440      | CEP164      | 614848      | SNAI2       | 602150      |
| CRYBB3      | 123630      | FKRP        | 606596      | GFAP        | 137780      | EDNRB       | 131244      |
| CRYBA4      | 123631      | ISPD        | 614631      | MIR204      | 610942      | EDN3        | 131242      |
| CRYBB2      | 123620      | POMGNT2     | 614828      | RDH11       | 607849      | SOX10       | 602229      |
| VIM         | 193060      | PLG         | 173350      | TUB         | 601197      | RAB3GAP1    | 602536      |
| CHMP4B      | 610897      | TIMM8A      | 300356      | ITM2B       | 603904      | RAB3GAP2    | 609275      |
| BFSP1       | 603307      | EP300       | 602700      | RBP4        | 180250      | RAB18       | 602207      |
| TDRD7       | 611258      | FUCA1       | 612280      | LAMA1       | 150320      | TBC1D20     | 611663      |
| AGK         | 610345      | ITGB3       | 173470      | PANK2       | 606157      | WRN         | 604611      |
| CRYGB       | 123670      | CHN1        | 118423      | PRKCG       | 176980      | ATP7B       | 606882      |
| CRYGD       | 123690      | SALL4       | 607343      | TRNT1       | 612907      | NIPBL       | 608667      |
| NHS         | 300457      | ABCC2       | 601107      | ABHD12      | 613599      | HDAC8       | 300269      |
| WFS1        | 606201      | ACD         | 609377      | MT-TP       | 590075      | GPR143      | 300808      |
| CRYBA2      | 600836      | NHP2        | 606470      | ANAPC1      | 608473      | DNAJC19     | 608977      |
| HSF4        | 602438      | NOP10       | 606471      | EMC1        | 616846      | SF3B4       | 605593      |
| EPHA2       | 176946      | TERT        | 187270      | NEUROD1     | 601724      | PIK3R1      | 171833      |
| CRYAA       | 123580      | WRAP53      | 612661      | OR2W3       | 616729      | HGD         | 607474      |
| IARS2       | 612801      | EDARADD     | 606603      | SPP2        | 602637      | KCNJ10      | 602208      |
| MSMO1       | 607545      | PKP1        | 601975      | ADGRA3      | 612303      | MRE11A      | 600814      |
| CAV1        | 601047      | COL3A1      | 120180      | AGBL5       | 615900      | ATM         | 607585      |
| SLC33A1     | 603690      | PLOD1       | 153454      | ARL3        | 604695      | ATP2C1      | 604384      |
| FOXE3       | 601094      | TNXB        | 600985      | DHX38       | 605584      | COL6A3      | 120250      |
| ADAMTSL4    | 610113      | LOXL1       | 153456      | EXOSC2      | 602238      | COL6A2      | 120240      |
| SLC16A12    | 611910      | MC1R        | 155555      | HK1         | 142600      | BLM         | 210900      |
| FBN1        | 134797      | IKBKAP      | 603722      | KIAA1549    | 613344      | MTM1        | 300415      |
| ADAMTS10    | 608990      | FGFR1       | 136350      | KIZ         | 615757      | CYP27A1     | 606530      |
| ADAMTS17    | 607511      | FGFR2       | 176943      | MVK         | 251170      | TFAP2B      | 601601      |
| DCN         | 125255      | FGFR3       | 134934      | PRPF4       | 607795      | DNM2        | 602378      |
| KERA        | 603288      | LCAT        | 606967      | FLVCR1      | 609144      | PDK3        | 300906      |
| TGFBI       | 601692      | FRAS1       | 607830      | RP1         | 603937      | ARSE        | 300180      |
| TACSTD2     | 137290      | GRIP1       | 601993      | IMPDH1      | 146690      | EBP         | 300205      |
| KRT12       | 601687      | FREM2       | 608945      | PRPF31      | 606419      | GNPAT       | 602744      |
| VSX1        | 605020      | FRMD7       | 300628      | CRB1        | 604210      | CNTN1       | 600016      |
| SLC4A11     | 610206      | GALK1       | 604313      | PRPF8       | 607300      | RAD21       | 606462      |
| PIKFYVE     | 609414      | GALE        | 606953      | TULP1       | 602280      | SMC1A       | 300040      |
| PXDN        | 605158      | GALT        | 606999      | CA4         | 114760      | ALDH18A1    | 138250      |
| COL8A2      | 120252      | ANTXR1      | 606410      | PRPF3       | 607301      | ATP6V0A2    | 611716      |

|         |        |         |        |          |        |          |        |
|---------|--------|---------|--------|----------|--------|----------|--------|
| TCF4    | 602272 | GBA     | 606463 | ABCA4    | 601691 | EFEMP2   | 604633 |
| ZEB1    | 189909 | ROBO3   | 608630 | RP2      | 300757 | LTBP4    | 604710 |
| CHST6   | 605294 | GLB1    | 611458 | RPE65    | 180069 | PYCR1    | 179035 |
| KRT3    | 148043 | GM2A    | 613109 | OFD1     | 300170 | PRX      | 605725 |
| CHRD1   | 300350 | HEXA    | 606869 | EYS      | 612424 | DBH      | 609312 |
| UBIAD1  | 611632 | MLPH    | 606526 | CERKL    | 608381 | ADAR     | 146920 |
| ASB10   | 615054 | RAB27A  | 603868 | NRL      | 162080 | EMD      | 300384 |
| MYOC    | 601652 | JAM3    | 606871 | FAM161A  | 613596 | LMNA     | 150330 |
| OPTN    | 602432 | ACVRL1  | 601284 | RPGR     | 312610 | SYNE2    | 608442 |
| WDR36   | 609669 | ATL1    | 606439 | FSCN2    | 613596 | LAMA3    | 600805 |
| NTF4    | 162662 | HPS1    | 604982 | TOPORS   | 609507 | MYH11    | 160745 |
| CYP1B1  | 601771 | AP3B1   | 603401 | SNRNP200 | 601664 | MYLK     | 600922 |
| LTBP2   | 602091 | HPS3    | 606118 | SEMA4A   | 607292 | PRKG1    | 176894 |
| ATF6    | 605537 | HPS4    | 606682 | PRCD     | 610598 | ASAHI    | 613468 |
| CNGA3   | 600053 | HPS5    | 607521 | NR2E3    | 604485 | PORCN    | 300651 |
| CNGB3   | 605080 | HPS6    | 607522 | MERTK    | 604705 | FMR1     | 309550 |
| GNAT2   | 139340 | DTNBP1  | 607145 | RHO      | 180380 | CTSA     | 613111 |
| PDE6H   | 601190 | BLOC1S3 | 609762 | PDE6B    | 180072 | APC      | 611731 |
| HMCN1   | 608548 | BLOC1S6 | 604310 | PROM1    | 604365 | KIF1BP   | 609367 |
| TLR4    | 603030 | CBS     | 613381 | KLHL7    | 611119 | AGXT     | 604285 |
| CST3    | 604312 | IDUA    | 252800 | PDE6A    | 180071 | GRHPR    | 604296 |
| CX3CR1  | 601470 | FTL     | 134790 | RGR      | 600342 | HOGA1    | 613597 |
| CFI     | 217030 | GCM2    | 603716 | CNGB1    | 600724 | PTH      | 168450 |
| C2      | 613927 | FAM126A | 610531 | IDH3B    | 604526 | STS      | 300747 |
| CFB     | 138470 | GJB2    | 121011 | SAG      | 181031 | KDM6A    | 300128 |
| C9      | 120940 | IKBKG   | 300248 | GUCA1B   | 602275 | KMT2D    | 602113 |
| FBLN5   | 604580 | RAX     | 601881 | CNGA1    | 123825 | ATP13A2  | 610513 |
| CFH     | 134370 | GDF6    | 601147 | TTC8     | 608132 | SGCB     | 600900 |
| ERCC6   | 609413 | MFRP    | 606227 | C2orf71  | 613425 | SGCD     | 601411 |
| HTRA1   | 602194 | PRSS56  | 613858 | ARL6     | 608845 | TTN      | 188840 |
| ARMS2   | 611313 | GDF3    | 606522 | IMPG2    | 607056 | COX7B    | 300885 |
| C3      | 120700 | KIF21A  | 608283 | PDE6G    | 180073 | CREBBP   | 600140 |
| ALMS1   | 606844 | COL18A1 | 120328 | ZNF513   | 613598 | TGFBR1   | 190181 |
| GABRB1  | 137190 | GALC    | 606890 | DHDDS    | 608172 | TGFBR2   | 190182 |
| IFT27   | 615870 | COX10   | 602125 | PRPF6    | 613979 | SMAD3    | 603109 |
| BBS1    | 209901 | COX15   | 603646 | CLRN1    | 606397 | TGFB2    | 190220 |
| BBS10   | 610148 | SURF1   | 185620 | MAK      | 154235 | TGFB3    | 190230 |
| TRIM32  | 602290 | OCRL    | 300535 | C8orf37  | 614477 | KCNH2    | 152427 |
| BBS12   | 610683 | FREM1   | 608944 | CDHR1    | 609502 | KCNJ2    | 600681 |
| MKS1    | 609883 | MAP2K1  | 176872 | RBP3     | 180290 | TSC1     | 605284 |
| WDPCP   | 613580 | SIL1    | 608005 | NEK2     | 604043 | TSC2     | 191092 |
| SDCCAG8 | 613524 | TUBGCP4 | 609610 | SLC7A14  | 615720 | MAN2B1   | 609458 |
| LZTFL1  | 606568 | TUBGCP6 | 610053 | PRPH2    | 179605 | MANBA    | 609489 |
| BBIP1   | 613605 | VSX2    | 142993 | IFT172   | 607386 | GNAS     | 139320 |
| BBS2    | 606151 | SHH     | 600725 | HGSNAT   | 610453 | FLNA     | 300017 |
| BBS4    | 600374 | ABCY6   | 605452 | RP9      | 607331 | AUH      | 600529 |
| BBS5    | 603650 | STRA6   | 610745 | GNPTG    | 607838 | MMACHC   | 609831 |
| MKKS    | 604896 | ALDH1A3 | 600463 | ARL2BP   | 615407 | ASPM     | 605481 |
| BBS7    | 607590 | DHODH   | 126064 | INVS     | 243305 | CDK5RAP2 | 608201 |
| BBS9    | 607968 | RYR1    | 180901 | NPHP1    | 607100 | CEP135   | 611423 |
| PLA2G5  | 601192 | GFER    | 600924 | NPHP4    | 607215 | CEP152   | 613529 |

|         |        |          |        |          |        |           |        |
|---------|--------|----------|--------|----------|--------|-----------|--------|
| OPN1MW  | 300822 | ACTA2    | 102620 | IQCB1    | 609237 | ZNF335    | 610827 |
| RLBP1   | 180090 | TRIM37   | 605073 | ELOVL4   | 605512 | TACO1     | 612958 |
| PNPLA6  | 603197 | B4GAT1   | 605517 | TEAD1    | 189967 | DYSF      | 603009 |
| KIF11   | 148760 | DAG1     | 128239 | OPN1SW   | 613522 | MCOLN1    | 605248 |
| CHM     | 303100 | LARGE1   | 603590 | ADGRV1   | 602851 | ARSB      | 611542 |
| TMEM67  | 609884 | AGRN     | 103320 | WHRN     | 607928 | GALNS     | 612222 |
| OPN1LW  | 300824 | CHAT     | 118490 | CEP250   | 609689 | GNS       | 607664 |
| DRAM2   | 613360 | COLQ     | 603033 | MYO7A    | 276903 | GUSB      | 611499 |
| PCYT1A  | 123695 | ADAMTS18 | 607512 | USH1C    | 605242 | IDS       | 300823 |
| UNC119  | 604011 | LAMB2    | 150325 | CDH23    | 605516 | NAGLU     | 609701 |
| C21orf2 | 603191 | PPT1     | 600722 | PCDH15   | 605514 | MSH2      | 609309 |
| RAX2    | 610362 | CTSD     | 116840 | USH1G    | 607696 | ITGA7     | 600536 |
| GUCA1A  | 600364 | GRN      | 138945 | USH2A    | 608400 | LAMA2     | 156225 |
| RAB28   | 612994 | CTSF     | 603539 | PDZD7    | 612971 | SEPN1     | 606210 |
| TTLL5   | 612268 | TPP1     | 607998 | HARS     | 142810 | PLEC      | 601282 |
| POC1B   | 614784 | CLN3     | 607042 | CIB2     | 605564 | CHRNG     | 100730 |
| PDE6C   | 600827 | DNAJC5   | 611203 | MT-TS2   | 590085 | DOK7      | 610285 |
| PITPNM3 | 608921 | CLN6     | 608102 | VCAN     | 118661 | MSTN      | 601788 |
| RIMS1   | 606629 | CLN5     | 608102 | TLR2     | 603028 | SCN4A     | 603967 |
| ADAM9   | 602713 | CLN8     | 607837 | RS1      | 300839 | DMPK      | 605377 |
| ACBD5   | 616618 | MT-ATP6  | 516060 | PEX10    | 602859 | CNBP      | 116955 |
| GNAT1   | 139330 | ABHD5    | 275630 | PEX11B   | 603867 | LMX1B     | 602575 |
| GRK1    | 180381 | NPC2     | 601015 | PEX12    | 601758 | NPC1      | 607107 |
| CACNA1F | 300110 | SMPD1    | 607608 | PEX13    | 601789 | TPM2      | 190990 |
| NYX     | 300278 | PTPN11   | 176876 | PEX14    | 601791 | TPM3      | 191030 |
| TRPM1   | 603576 | KRAS     | 190070 | PEX16    | 603360 | NEB       | 256030 |
| SLC24A1 | 603617 | SOS1     | 182530 | PEX26    | 608666 | CFL2      | 601443 |
| GRM6    | 604096 | RAF1     | 164760 | PEX5     | 600414 | SPINK5    | 605010 |
| CABP4   | 608965 | NRAS     | 164790 | PEX6     | 601498 | PLA2G6    | 603604 |
| GPR179  | 614515 | BRAF     | 164757 | PEX2     | 170993 | C19orf12  | 614297 |
| LRIT3   | 615004 | IGBP1    | 300139 | PEX7     | 601757 | COASY     | 609855 |
| GNB3    | 139130 | HMX1     | 142992 | SLITRK6  | 609681 | MID1      | 300552 |
| CYP4V2  | 608614 | OCA2     | 611409 | P3H2     | 610341 | DDX59     | 615464 |
| ROM1    | 180721 | TYRP1    | 115501 | LRPAP1   | 104225 | TNFRSF11A | 603499 |
| EFEMP1  | 601548 | SLC45A2  | 606574 | PRIMPOL  | 615421 | OSTM1     | 607649 |
| ZNF408  | 616454 | SLC24A5  | 609802 | ZNF644   | 614159 | SNX10     | 614780 |
| RCBTB1  | 607867 | C10orf11 | 614537 | ACO2     | 100850 | TCIRG1    | 604592 |
| FZD4    | 604579 | GJA1     | 121014 | MT-ND1   | 516000 | TNFSF11   | 602642 |
| LRP5    | 603506 | PABPN1   | 602279 | ATP1A3   | 182350 | SLC26A4   | 605646 |
| TSPAN12 | 613138 | KCTD7    | 611725 | RTN4IP1  | 610502 | STK11     | 602216 |
| OAT     | 613349 | DMD      | 300377 | UCHL1    | 191342 | PGK1      | 311800 |
| CNNM4   | 607805 | B3GLCT   | 610308 | AFG3L2   | 604581 | KIT       | 164920 |
| CSPP1   | 611654 | PHOX2A   | 602753 | C12orf65 | 613541 | CHMP1A    | 164010 |
| TCTN2   | 613846 | TUBA8    | 605742 | PRPS1    | 311850 | EXOSC3    | 606489 |
| B9D1    | 614144 | POLG     | 174763 | SLC25A46 | 610826 | RARS2     | 611524 |
| INPP5E  | 613037 | RNASEH1  | 604123 | OPA1     | 605290 | TSEN2     | 608753 |
| TTC21B  | 612014 | SLC25A4  | 103220 | OPA3     | 606580 | TSEN34    | 608754 |
| KIF7    | 611254 | C10orf2  | 606075 | TMEM126A | 612988 | TSEN54    | 608755 |
| TCTN1   | 609863 | POLG2    | 604983 | MFN2     | 608507 | VRK1      | 602168 |
| TMEM237 | 614423 | RRM2B    | 604712 | SIX6     | 606326 | UROD      | 613521 |
| CEP41   | 610523 | DNA2     | 601810 | NBAS     | 608025 | PHYH      | 602026 |

|          |        |          |        |         |        |          |        |
|----------|--------|----------|--------|---------|--------|----------|--------|
| TMEM138  | 614459 | RGS9     | 604067 | PAX6    | 607108 | AGPS     | 603051 |
| C5orf42  | 614571 | RGS9BP   | 607814 | GP1BA   | 606672 | TWIST1   | 601622 |
| TCTN3    | 613847 | SLC4A4   | 603345 | CISD2   | 611507 | ACTA1    | 102610 |
| ZNF423   | 604557 | PAX2     | 167409 | NF2     | 607379 | FHL1     | 300163 |
| TMEM216  | 613277 | ZFYVE26  | 612012 | NF1     | 162200 | TRPV4    | 605427 |
| TMEM231  | 614949 | TREX1    | 606609 | COLEC11 | 612502 | HSPG2    | 142461 |
| AHI1     | 608894 | PLK4     | 605031 | MPZ     | 159440 | NEU1     | 608272 |
| ARL13B   | 608922 | TINF2    | 604319 | JAG1    | 601920 | DHCR7    | 602858 |
| CC2D2A   | 612013 | KIAA0196 | 610657 | NOTCH2  | 600275 | NFIX     | 164005 |
| LRAT     | 604863 | RECQL4   | 268400 | COL4A4  | 120131 | AP4M1    | 602296 |
| C1QTNF5  | 608752 | ESCO2    | 609353 | COL4A5  | 303630 | AP5Z1    | 613653 |
| CLUAP1   | 616787 | HESX1    | 601802 | TP63    | 603273 | B4GALNT1 | 601873 |
| NPHP3    | 608002 | ALDH3A2  | 609523 | FGF10   | 602115 | CYP2U1   | 610670 |
| PEX1     | 602136 | MTPAP    | 613669 | SLC2A10 | 606145 | CYP7B1   | 603711 |
| GUCY2D   | 600179 | SYNE1    | 608441 | APTX    | 606350 | DDHD2    | 615003 |
| CEP290   | 610142 | ANO10    | 613726 | SETX    | 608465 | ERLIN2   | 611605 |
| RD3      | 180040 | EEF2     | 130610 | FOXC1   | 601090 | FA2H     | 611026 |
| RDH12    | 608830 | ITPR1    | 147265 | PITX2   | 601542 | GBA2     | 609471 |
| KCNJ13   | 603208 | KCNC3    | 176264 | ACTB    | 102630 | HSPD1    | 118190 |
| SPATA7   | 609868 | KCND3    | 605411 | ACTG1   | 102560 | KIF1A    | 601255 |
| AIPL1    | 604392 | SPTBN2   | 604985 | PTCH1   | 601309 | KIF5A    | 602821 |
| LCA5     | 611408 | SYT14    | 610949 | PTCH2   | 603673 | MARS2    | 609728 |
| RPGRIP1  | 605446 | TGM6     | 613900 | NSD1    | 606681 | NIPA1    | 608145 |
| CRX      | 602225 | TTBK2    | 611695 | NOD2    | 605956 | REEP1    | 609139 |
| NMNAT1   | 608700 | WVOX     | 605131 | FOXL2   | 605597 | RTN2     | 603183 |
| DTHD1    | 616979 | ATXN10   | 611150 | DRD5    | 126453 | SPG11    | 610844 |
| ADIPOR1  | 607945 | ATXN7    | 607640 | PHF6    | 300414 | SPG7     | 602783 |
| MT-TL1   | 590050 | COL2A1   | 120140 | NR2F1   | 132890 | ZFYVE27  | 610243 |
| SOD2     | 147460 | COL11A1  | 120280 | COL4A1  | 120130 | MAPT     | 157140 |
| BEST1    | 607854 | COL11A2  | 120290 | TFAP2A  | 107580 | SALL1    | 602218 |
| IMPG1    | 602870 | COL9A1   | 120210 | ZNF469  | 612078 | POLR1C   | 610060 |
| PRDM13   | 616741 | COL9A2   | 120260 | PRDM5   | 614161 | BAP1     | 603089 |
| CDH3     | 114021 | NAA10    | 300013 | CYLD    | 605018 | FAH      | 613871 |
| IFT140   | 614620 | VAX1     | 604294 | ABCA3   | 601615 | IRF6     | 607199 |
| MAPKAPK3 | 602130 | RARB     | 180220 | CCM2    | 607929 | TBX1     | 602054 |
| CAPN5    | 602537 | HMGB3    | 300193 | ERCC2   | 126340 | EPG5     | 615068 |
| MFSD8    | 611124 | MAB21L2  | 604357 | ERCC1   | 126380 | ERCC3    | 133510 |
| SEMA3E   | 608166 | RB1      | 614041 | CTC1    | 613129 | XPA      | 611153 |
| CHD7     | 608892 | XPC      | 613208 |         |        |          |        |
